# Supplementary material for: Identification of differentially expressed genes related to aphid resistance in cucumber (Cucumis sativus L.)
Source: PubMed Central journal article supplement — Sci Rep. 2015 May 11;5:9645. doi: 10.1038/srep09645 (PMC4429468; doi:10.1038/srep09645), 2015-05-11
Supplement: srep09645-s1.pdf [file srep09645-s1.pdf]

# Supplementary Information

## Identification of differentially expressed genes related to aphid resistance in cucumber (*Cucumis sativus* L.)

Danna Liang, Min Liu, Qijing Hu, Min He, Xiaohua Qi, Qiang Xu, Fucai Zhou & Xuehao Chen\*

School of Horticulture and Plant Protection, Yangzhou University, Yangzhou, Jiangsu 225009, P.R.China

\*Corresponding authors.

Xuehao Chen

Tel: +86-514-87971894;

Fax: +86-514-87347537;

E-mail: [xhchen@yzu.edu.cn](mailto:xhchen@yzu.edu.cn)

## Supplementary Contents:

Supplementary Fig. S1

A, Experimental process of digital gene expression profile. B, Principle and procedure of Tag preparation. Beads of Oligo (dT) are used to enrich mRNA from the total RNA, and then are transferred into double-stranded cDNA through reverse transcription. Four base recognition enzyme NlaIII is used to digest this cDNA, and Illumina adaptor 1 is ligated. MmeI is used to digest at 17 bp downstream of CATG site; Illumina adaptor 2 is ligated at 3' end. Primer GX1 and Primer GX2 are added for PCR. Then, regain 85 bp strips through 6% PAGE Gel electrophoresis. The qualified library followed by Illumina sequencing.

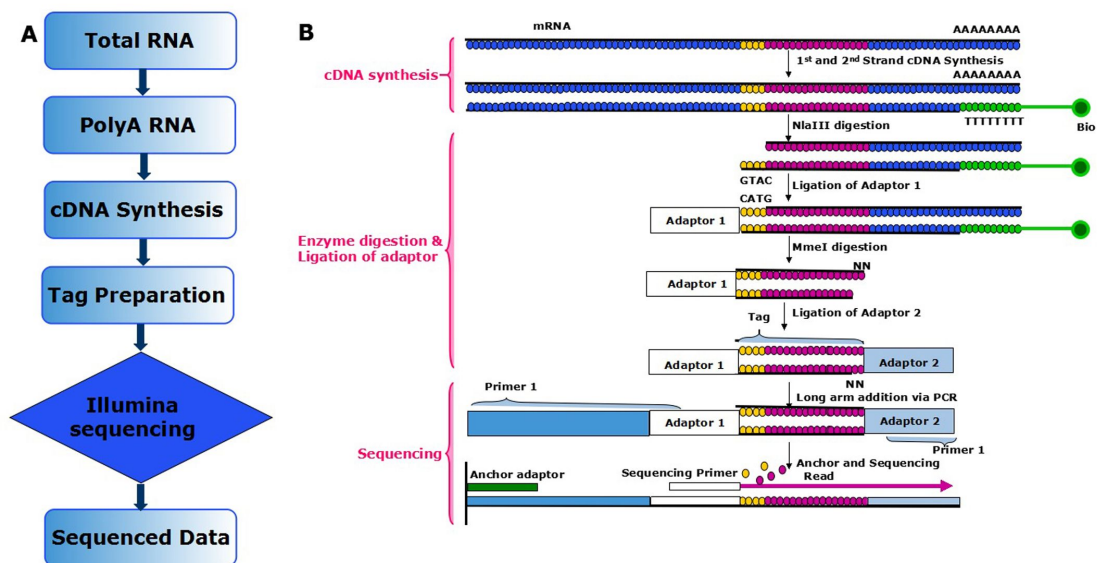

Supplementary Fig. S2

Distribution of total clean tag and distinct clean tag copy numbers from the nine libraries.

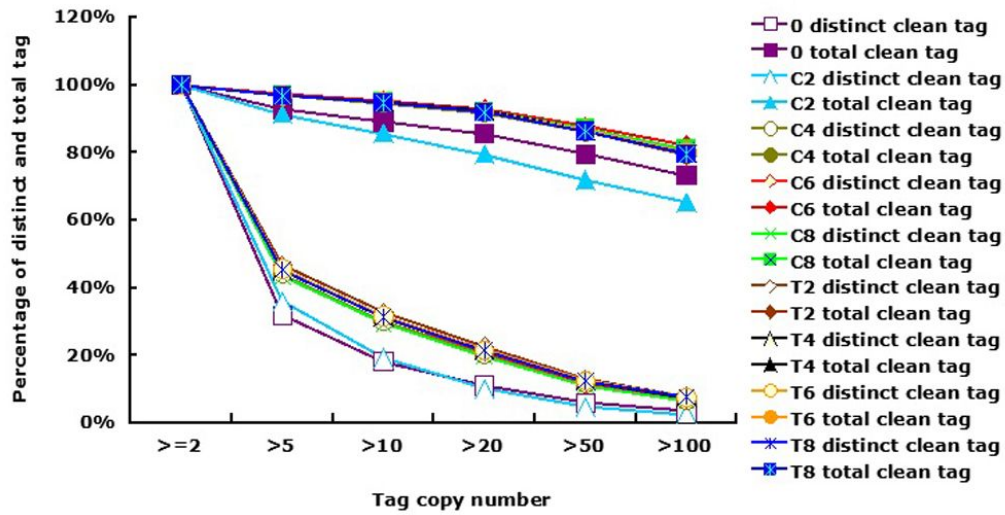

Supplementary Fig. S3

Sequencing saturation analysis of the nine libraries of 0, T2, T4, T6, T8, C2, C4, C6 and C8. The number of detected genes was saturated after the sequencing counts reached 2 million tags or higher.

**Saturation Analysis of 0**

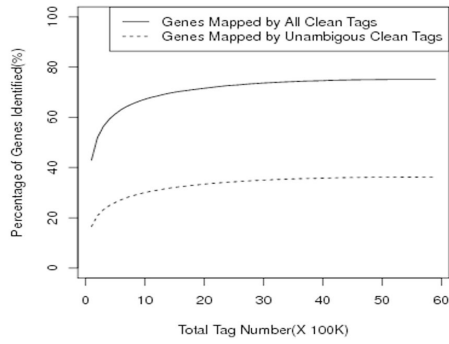

**Saturation Analysis of C2**

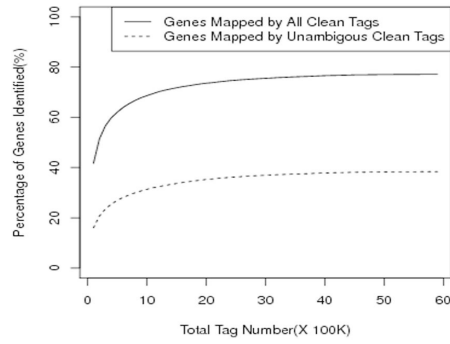

**Saturation Analysis of C4**

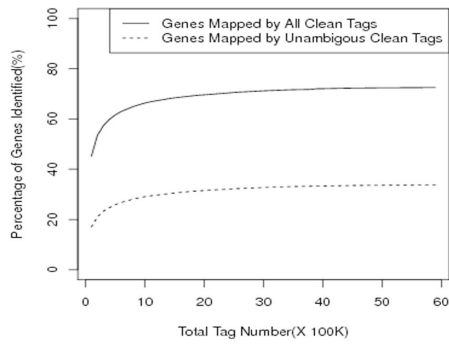

**Saturation Analysis of C6**

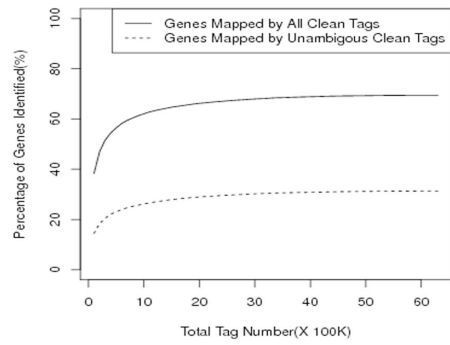

**Saturation Analysis of C8**

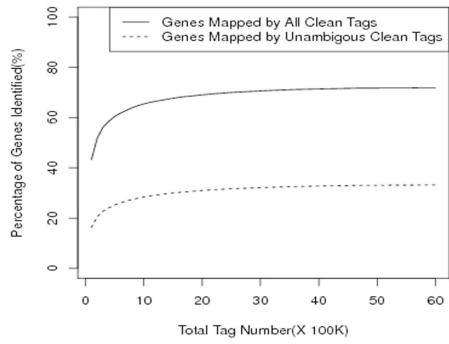

**Saturation Analysis of T2**

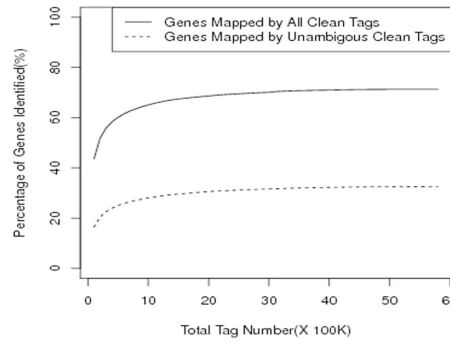

**Saturation Analysis of T4**

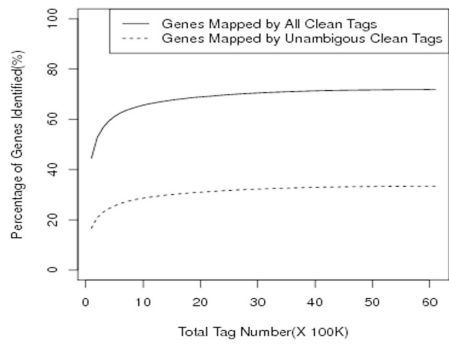

**Saturation Analysis of T6**

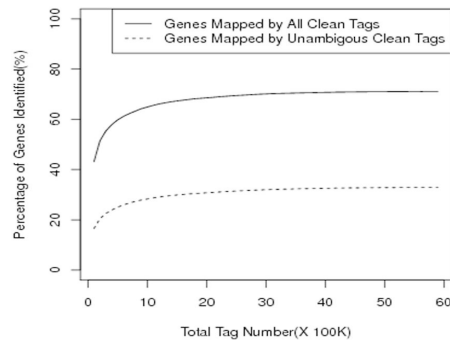

**Saturation Analysis of T8**

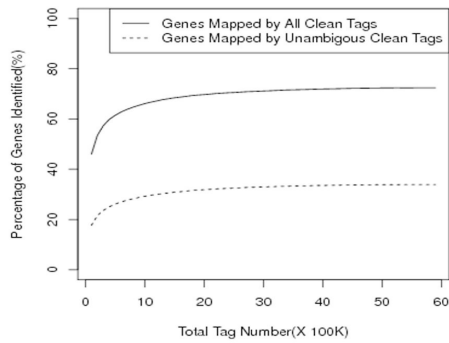

## Supplementary Table S1

Categorisation and abundance of tags. Clean tags are tags that remained after filtering out low quality tags from the raw data. Distinct tags are different types of tags. Unambiguous tags are clean tags that remained after the removal of tags mapped to the reference sequences of multiple genes.

| Summary                         |                             | 0       | C2      | C4      | C6      | C8      |
|---------------------------------|-----------------------------|---------|---------|---------|---------|---------|
| Raw Data                        | Total                       | 5808271 | 5883119 | 5824273 | 6248148 | 5938708 |
|                                 | Distinct Tag                | 417850  | 469353  | 244068  | 236052  | 230243  |
| Clean Tag                       | Total number                | 5582943 | 5665356 | 5683185 | 6103662 | 5805545 |
|                                 | Distinct Tag number         | 202333  | 260081  | 113440  | 103722  | 108680  |
| All Tag Mapping to Gene         | Total number                | 3896797 | 3432730 | 4364832 | 4430137 | 4533808 |
|                                 | Total % of clean tag        | 69.80%  | 60.59%  | 76.80%  | 72.58%  | 78.09%  |
|                                 | Distinct Tag number         | 63859   | 65767   | 63348   | 55671   | 60728   |
|                                 | Distinct Tag % of clean tag | 31.56%  | 25.29%  | 55.84%  | 53.67%  | 55.88%  |
| Unambiguous Tag Mapping to Gene | Total number                | 2677373 | 2228487 | 2845283 | 3107254 | 3062177 |
|                                 | Total % of clean tag        | 47.96%  | 39.34%  | 50.06%  | 50.91%  | 52.75%  |
|                                 | Distinct Tag number         | 40570   | 42354   | 39080   | 34887   | 37848   |
|                                 | Distinct Tag % of clean tag | 20.05%  | 16.28%  | 34.45%  | 33.64%  | 34.83%  |
| All Tag-mapped Genes            | number                      | 24599   | 25509   | 23066   | 22199   | 22801   |
|                                 | % of ref genes              | 81.01%  | 84.01%  | 75.96%  | 73.11%  | 75.09%  |
| Unambiguous Tag-mapped Genes    | number                      | 12806   | 13775   | 11276   | 10508   | 11024   |
|                                 | % of ref genes              | 42.17%  | 45.37%  | 37.14%  | 34.61%  | 36.31%  |
| Mapping to Genome               | Total number                | 1273678 | 1751864 | 1011306 | 1171255 | 931490  |
|                                 | Total % of clean tag        | 22.81%  | 30.92%  | 17.79%  | 19.19%  | 16.04%  |
|                                 | Distinct Tag number         | 112798  | 162467  | 38122   | 33617   | 35062   |
|                                 | Distinct Tag % of clean tag | 55.75%  | 62.47%  | 33.61%  | 32.41%  | 32.26%  |
| Unknown Tag                     | Total number                | 412468  | 480762  | 307047  | 502270  | 340247  |
|                                 | Total % of clean tag        | 7.39%   | 8.49%   | 5.40%   | 8.23%   | 5.86%   |
|                                 | Distinct Tag number         | 25676   | 31847   | 11970   | 14434   | 12890   |
|                                 | Distinct Tag % of clean tag | 12.69%  | 12.25%  | 10.55%  | 13.92%  | 11.86%  |

Supplementary Table S2

| Summary                         |                             | 0       | T2      | T4      | T6      | T8      |
|---------------------------------|-----------------------------|---------|---------|---------|---------|---------|
| Raw Data                        | Total                       | 5808271 | 5762257 | 6039725 | 5815223 | 5887217 |
|                                 | Distinct Tag                | 417850  | 248439  | 248882  | 241685  | 240808  |
| Clean Tag                       | Total number                | 5582943 | 5610525 | 5890728 | 5669976 | 5747924 |
|                                 | Distinct Tag number         | 202333  | 106688  | 111307  | 106969  | 113211  |
| All Tag Mapping to Gene         | Total number                | 3896797 | 4014390 | 4351359 | 4123969 | 4274435 |
|                                 | Total % of clean tag        | 69.80%  | 71.55%  | 73.87%  | 72.73%  | 74.36%  |
|                                 | Distinct Tag number         | 63859   | 58541   | 60271   | 58163   | 59889   |
|                                 | Distinct Tag % of clean tag | 31.56%  | 54.87%  | 54.15%  | 54.37%  | 52.90%  |
| Unambiguous Tag Mapping to Gene | Total number                | 2677373 | 2617936 | 2894726 | 2719612 | 2721606 |
|                                 | Total % of clean tag        | 47.96%  | 46.66%  | 49.14%  | 47.97%  | 47.35%  |
|                                 | Distinct Tag number         | 40570   | 36343   | 37474   | 36111   | 37223   |
|                                 | Distinct Tag % of clean tag | 20.05%  | 34.06%  | 33.67%  | 33.76%  | 32.88%  |
| All Tag-mapped Genes            | number                      | 24599   | 22688   | 22830   | 22645   | 23101   |
|                                 | % of ref genes              | 81.01%  | 74.72%  | 75.19%  | 74.58%  | 76.08%  |
| Unambiguous Tag-mapped Genes    | number                      | 12806   | 10853   | 11110   | 10921   | 11368   |
|                                 | % of ref genes              | 42.17%  | 35.74%  | 36.59%  | 35.97%  | 37.44%  |
| Mapping to Genome               | Total number                | 1273678 | 1121714 | 1144816 | 1220420 | 1138112 |
|                                 | Total % of clean tag        | 22.81%  | 19.99%  | 19.43%  | 21.52%  | 19.80%  |
|                                 | Distinct Tag number         | 112798  | 33290   | 36706   | 35868   | 39689   |
|                                 | Distinct Tag % of clean tag | 55.75%  | 31.20%  | 32.98%  | 33.53%  | 35.06%  |
| Unknown Tag                     | Total number                | 412468  | 474421  | 394553  | 325587  | 335377  |
|                                 | Total % of clean tag        | 7.39%   | 8.46%   | 6.70%   | 5.74%   | 5.83%   |
|                                 | Distinct Tag number         | 25676   | 14857   | 14330   | 12938   | 13633   |
|                                 | Distinct Tag % of clean tag | 12.69%  | 13.93%  | 12.87%  | 12.10%  | 12.04%  |

## Supplementary Table S3

### Distribution of tag numbers from the nine libraries

|    |                                                      | Distinct Tag |        | Total Tag Number |        | Number of Gene |        |
|----|------------------------------------------------------|--------------|--------|------------------|--------|----------------|--------|
| 0  | All Tag Mapping to Sense Gene                        | 35659        | 17.62% | 3409389          | 61.07% | 22803          | 75.10% |
|    | Unambiguous Tag Mapping to Sense Gene                | 22845        | 11.29% | 2342316          | 41.95% | 10995          | 36.21% |
|    | All Tag Mapping to Anti-Sense Gene                   | 28200        | 13.94% | 487408           | 8.73%  | 20353          | 67.03% |
|    | Unambiguous Tag Mapping to Anti-Sense Gene           | 17725        | 8.76%  | 335057           | 6.00%  | 9488           | 31.25% |
|    | All Tag Mapping to Gene (Sense & Anti-Sense)         | 63859        | 31.56% | 3896797          | 69.80% | 24599          | 81.01% |
|    | Unambiguous Tag Mapping to Gene (Sense & Anti-Sense) | 40570        | 20.05% | 2677373          | 47.96% | 12806          | 42.17% |
| C2 | All Tag Mapping to Sense Gene                        | 35740        | 13.74% | 2946328          | 52.01% | 23420          | 77.13% |
|    | Unambiguous Tag Mapping to Sense Gene                | 23252        | 8.94%  | 1915134          | 33.80% | 11643          | 38.34% |
|    | All Tag Mapping to Anti-Sense Gene                   | 30027        | 11.55% | 486402           | 8.59%  | 21291          | 70.12% |
|    | Unambiguous Tag Mapping to Anti-Sense Gene           | 19102        | 7.34%  | 313353           | 5.53%  | 10299          | 33.92% |
|    | All Tag Mapping to Gene (Sense & Anti-Sense)         | 65767        | 25.29% | 3432730          | 60.59% | 25509          | 84.01% |
|    | Unambiguous Tag Mapping to Gene (Sense & Anti-Sense) | 42354        | 16.28% | 2228487          | 39.34% | 13775          | 45.37% |
| C4 | All Tag Mapping to Sense Gene                        | 35793        | 31.55% | 3792384          | 66.73% | 22011          | 72.49% |
|    | Unambiguous Tag Mapping to Sense Gene                | 22368        | 19.72% | 2468918          | 43.44% | 10224          | 33.67% |
|    | All Tag Mapping to Anti-Sense Gene                   | 27555        | 24.29% | 572448           | 10.07% | 18898          | 62.24% |
|    | Unambiguous Tag Mapping to Anti-Sense Gene           | 16712        | 14.73% | 376365           | 6.62%  | 8132           | 26.78% |
|    | All Tag Mapping to Gene (Sense & Anti-Sense)         | 63348        | 55.84% | 4364832          | 76.80% | 23066          | 75.96% |
|    | Unambiguous Tag Mapping to Gene (Sense & Anti-Sense) | 39080        | 34.45% | 2845283          | 50.06% | 11276          | 37.14% |
| C6 | All Tag Mapping to Sense Gene                        | 31788        | 30.65% | 3885784          | 63.66% | 21084          | 69.44% |
|    | Unambiguous Tag Mapping to Sense Gene                | 20240        | 19.51% | 2722464          | 44.60% | 9507           | 31.31% |
|    | All Tag Mapping to Anti-Sense Gene                   | 23883        | 23.03% | 544353           | 8.92%  | 17296          | 56.96% |
|    | Unambiguous Tag Mapping to Anti-Sense Gene           | 14647        | 14.12% | 384790           | 6.30%  | 7361           | 24.24% |
|    | All Tag Mapping to Gene (Sense & Anti-Sense)         | 55671        | 53.67% | 4430137          | 72.58% | 22199          | 73.11% |

|    |                                                      |       |        |         |        |       |        |
|----|------------------------------------------------------|-------|--------|---------|--------|-------|--------|
|    | Unambiguous Tag Mapping to Gene (Sense & Anti-Sense) | 34887 | 33.64% | 3107254 | 50.91% | 10508 | 34.61% |
| C8 | All Tag Mapping to Sense Gene                        | 35432 | 32.60% | 3994304 | 68.80% | 21814 | 71.84% |
|    | Unambiguous Tag Mapping to Sense Gene                | 22367 | 20.58% | 2696080 | 46.44% | 10061 | 33.13% |
|    | All Tag Mapping to Anti-Sense Gene                   | 25296 | 23.28% | 539504  | 9.29%  | 18031 | 59.38% |
|    | Unambiguous Tag Mapping to Anti-Sense Gene           | 15481 | 14.24% | 366097  | 6.31%  | 7746  | 25.51% |
|    | All Tag Mapping to Gene (Sense & Anti-Sense)         | 60728 | 55.88% | 4533808 | 78.09% | 22801 | 75.09% |
|    | Unambiguous Tag Mapping to Gene (Sense & Anti-Sense) | 37848 | 34.83% | 3062177 | 52.75% | 11024 | 36.31% |
| T2 | All Tag Mapping to Sense Gene                        | 32508 | 30.47% | 3485173 | 62.12% | 21653 | 71.31% |
|    | Unambiguous Tag Mapping to Sense Gene                | 20469 | 19.19% | 2263292 | 40.34% | 9874  | 32.52% |
|    | All Tag Mapping to Anti-Sense Gene                   | 26033 | 24.40% | 529217  | 9.43%  | 18199 | 59.94% |
|    | Unambiguous Tag Mapping to Anti-Sense Gene           | 15874 | 14.88% | 354644  | 6.32%  | 7779  | 25.62% |
|    | All Tag Mapping to Gene (Sense & Anti-Sense)         | 58541 | 54.87% | 4014390 | 71.55% | 22688 | 74.72% |
|    | Unambiguous Tag Mapping to Gene (Sense & Anti-Sense) | 36343 | 34.06% | 2617936 | 46.66% | 10853 | 35.74% |
| T4 | All Tag Mapping to Sense Gene                        | 33773 | 30.34% | 3849067 | 65.34% | 21810 | 71.83% |
|    | Unambiguous Tag Mapping to Sense Gene                | 21348 | 19.18% | 2557205 | 43.41% | 10132 | 33.37% |
|    | All Tag Mapping to Anti-Sense Gene                   | 26498 | 23.81% | 502292  | 8.53%  | 18670 | 61.49% |
|    | Unambiguous Tag Mapping to Anti-Sense Gene           | 16126 | 14.49% | 337521  | 5.73%  | 8007  | 26.37% |
|    | All Tag Mapping to Gene (Sense & Anti-Sense)         | 60271 | 54.15% | 4351359 | 73.87% | 22830 | 75.19% |
|    | Unambiguous Tag Mapping to Gene (Sense & Anti-Sense) | 37474 | 33.67% | 2894726 | 49.14% | 11110 | 36.59% |
| T6 | All Tag Mapping to Sense Gene                        | 32643 | 30.52% | 3643596 | 64.26% | 21577 | 71.06% |
|    | Unambiguous Tag Mapping to Sense Gene                | 20625 | 19.28% | 2405531 | 42.43% | 9980  | 32.87% |
|    | All Tag Mapping to Anti-Sense Gene                   | 25520 | 23.86% | 480373  | 8.47%  | 18149 | 59.77% |
|    | Unambiguous Tag Mapping to Anti-Sense Gene           | 15486 | 14.48% | 314081  | 5.54%  | 7788  | 25.65% |
|    | All Tag Mapping to Gene (Sense & Anti-Sense)         | 58163 | 54.37% | 4123969 | 72.73% | 22645 | 74.58% |
|    | Unambiguous Tag Mapping to Gene (Sense & Anti-Sense) | 36111 | 33.76% | 2719612 | 47.97% | 10921 | 35.97% |
| T8 | All Tag Mapping to Sense Gene                        | 33460 | 29.56% | 3792213 | 65.98% | 21982 | 72.39% |
|    | Unambiguous Tag Mapping to Sense Gene                | 21129 | 18.66% | 2417062 | 42.05% | 10287 | 33.88% |



|                                                      |       |        |         |        |       |        |
|------------------------------------------------------|-------|--------|---------|--------|-------|--------|
| Gene                                                 |       |        |         |        |       |        |
| All Tag Mapping to Anti-Sense Gene                   | 26429 | 23.34% | 482222  | 8.39%  | 18879 | 62.18% |
| Unambiguous Tag Mapping to Anti-Sense Gene           | 16094 | 14.22% | 304544  | 5.30%  | 8248  | 27.16% |
| All Tag Mapping to Gene (Sense & Anti-Sense)         | 59889 | 52.90% | 4274435 | 74.36% | 23101 | 76.08% |
| Unambiguous Tag Mapping to Gene (Sense & Anti-Sense) | 37223 | 32.88% | 2721606 | 47.35% | 11368 | 37.44% |

---
